# Supplementary material for: Genomics of Re-Emergent Aeromonas salmonicida in Atlantic Salmon Outbreaks
Source: Microorganisms. 2023 Dec 29;12(1):64. doi: 10.3390/microorganisms12010064 (PMC10819690; doi:10.3390/microorganisms12010064)
Supplement: Supplementary file 1 [file microorganisms-12-00064-s001.zip › Supplementary Table S2 Average nucleotide identity values among A. salmonicida subspecies.xlsx]

## Sheet: Sheet1
	ASA04	ASA05	CIBA_5017
A_salmonicida_subsp._salmonicida_01-B526	99.5	99.52	99.51
A_salmonicida_subsp._salmonicida_890054	99.46	99.44	99.5
A_salmonicida_subsp._salmonicida_A449	99.45	99.49	99.48
A_salmonicida_subsp._achromogenes_23056	99.48	99.58	99.59
A_salmonicida_subsp._achromogenes_AS03	99.2	99.28	99.34
A_salmonicida_subsp._achromogenes_23055	99.45	99.58	99.57
A_salmonicida_subsp._masoucida_RZ6S-1	99.81	99.86	99.88
A_salmonicida_subsp._masoucida_BR19001YR	99.81	99.85	99.87
A_salmonicida_subsp._masoucida_RFAS1	99.82	99.85	99.88
A_salmonicida_subsp._smithia_JF4097	99.48	99.46	99.47
A_salmonicida_subsp._pectinolytica_34mel	96.78	96.81	96.78
